# Supplementary material
Source: PubMed Central journal article supplement (PMC10756058)
Supplement: NIHMS1943286-supplement-1.pdf [file NIHMS1943286-supplement-1.pdf]

## Table of Contents

|                           |         |
|---------------------------|---------|
| Supplement Figure 1 ..... | 2       |
| Supplement Figure 2 ..... | 3       |
| Supplement Table 1 .....  | 4 - 5   |
| Supplement Table 2 .....  | 6       |
| Supplement Table 3.....   | 7 - 9   |
| Appendix.....             | 10 - 16 |

**Supplement Figure 1: MTN-034 crossover design of six months of oral PrEP and six months of monthly dapivirine ring (ring)**

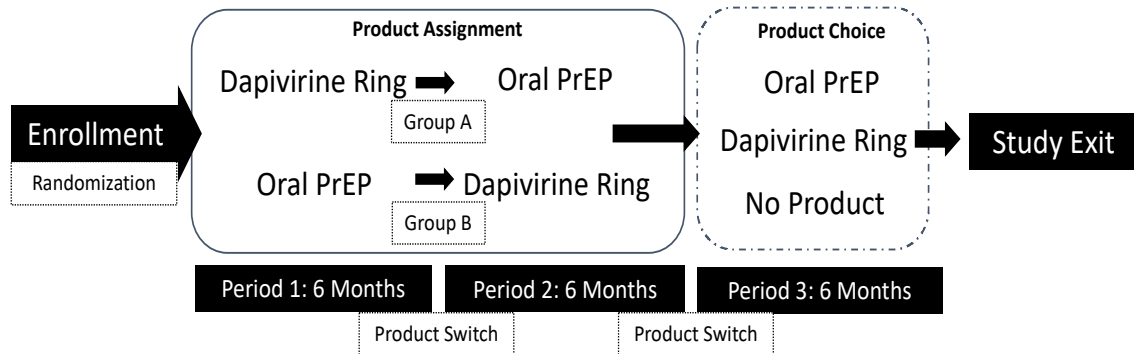

Legend for Supplement, Figure 1: Participants in the REACH study (MTN-034) were randomized 1:1 to Sequence A (monthly ring for six months followed by oral PrEP for six months) or Sequence B (oral PrEP for six months followed by monthly ring for six months). Participants attended monthly visits for product dispensation, adherence, and safety assessments. In the final product choice period, participants were offered the ring, oral PrEP, or no product and could switch between products or discontinue products.

**Supplement Figure 2: Adherence counseling in MTN 034/REACH based on semi-quantitative measures of product use**

| Dapivirine ring residual drug level cut-offs* | Adherence Category                                                                                   | Oral PrEP Cut-Offs based on intracellular TFV-DP levels** |
|-----------------------------------------------|------------------------------------------------------------------------------------------------------|-----------------------------------------------------------|
| DPV release rate $\geq 0.1071$ mg/day         | <br><b>High Use</b> | >700 fmol/punch (4 or more doses per week)                |
| DPV release rate 0.0321 - 0.1071 mg/day       | <br><b>Some Use</b> | 16.6 to 699 fmol/punch (~1-3 doses per week)              |
| DPV release $\leq 0.0321$ mg/day              | <br><b>No use</b> | < 16.6 fmol/punch (no TDF-FTC detected)                   |

**Legend for Supplement, Figure 2**

\* The dapivirine release rate was calculated by subtracting the amount of residual dapivirine (DPV) in a returned ring from the amount of DPV in control rings from the same lot divided by the duration of time during which the participant had the ring.

\*\*The intracellular concentrations of tenofovir diphosphate (TFV-DP) in dried blood spots (DBS) provide a cumulative measure of dosing and average adherence to oral PrEP in the prior four to six weeks. <sup>(21,22)</sup> Because steady-state levels for FTC/TDF are not reached until approximately six weeks, a lower threshold was used for counseling about FTC/TDF based on the month one DBS result: >500 fmol/punch for high and 16.6-499 fmol/punch for medium adherence.

**Supplement Table 1: Baseline characteristics of REACH participants by site**

| Number of Participants<br>n/%                 | Cape Town,<br>South Africa<br>N=60 | Johannesburg<br>South Africa<br>N=67 | Kampala<br>Uganda<br>N=60 | Harare<br>Zimbabwe<br>N=60 |
|-----------------------------------------------|------------------------------------|--------------------------------------|---------------------------|----------------------------|
| <b>Demographic characteristics</b>            |                                    |                                      |                           |                            |
| <b>Age</b>                                    |                                    |                                      |                           |                            |
| 16-17                                         | 18 (30%)                           | 19 (28%)                             | 20 (33%)                  | 28 (47%)                   |
| 18-19                                         | 29 (48%)                           | 33 (49%)                             | 28 (47%)                  | 24 (40%)                   |
| 20-21                                         | 13 (22%)                           | 15 (22%)                             | 12 (20%)                  | 8 (13%)                    |
| <b>Marital Status</b>                         |                                    |                                      |                           |                            |
| Single                                        | 60 (100%)                          | 65 (97%)                             | 53 (88%)                  | 36 (60%)                   |
| Married                                       | 0 (0%)                             | 0 (0%)                               | 0 (0%)                    | 10 (17%)                   |
| Cohabiting                                    | 0 (0%)                             | 2 (3%)                               | 7 (12%)                   | 11 (18%)                   |
| Separated or divorced                         | 0 (0%)                             | 0 (0%)                               | 0 (0%)                    | 3 (5%)                     |
| <b>Highest level of education</b>             |                                    |                                      |                           |                            |
| Primary                                       | 1 (2%)                             | 0 (0%)                               | 28 (47%)                  | 4 (7%)                     |
| Secondary                                     | 55 (92%)                           | 57 (85%)                             | 22 (37%)                  | 55 (93%)                   |
| College or university                         | 4 (7%)                             | 10 (15%)                             | 9 (15%)                   | 0 (0%)                     |
| <b>Currently in school</b>                    | 33 (55%)                           | 36 (54%)                             | 9 (15%)                   | 14 (23%)                   |
| <b>Earns income</b>                           | 2 (3%)                             | 6 (9%)                               | 31 (52%)                  | 14 (23%)                   |
| <b>Partner as a source of income</b>          | 0 (0%)                             | 24 (36%)                             | 38 (63%)                  | 19 (32%)                   |
| <b>Behavioral characteristics</b>             |                                    |                                      |                           |                            |
| <b>Ever pregnant</b>                          | 5 (8%)                             | 21 (31%)                             | 32 (53%)                  | 41 (68%)                   |
| <b>Alcohol consumption prior month</b>        |                                    |                                      |                           |                            |
| Never                                         | 13 (22%)                           | 13 (19%)                             | 36 (60%)                  | 41 (68%)                   |
| Monthly or less                               | 24 (40%)                           | 34 (51%)                             | 6 (10%)                   | 6 (10%)                    |
| 2-4 times a month                             | 16 (27%)                           | 17 (25%)                             | 13 (22%)                  | 8 (13%)                    |
| 2-3 times a week                              | 6 (10%)                            | 3 (4%)                               | 3 (5%)                    | 2 (3%)                     |
| 4 or more times a week                        | 1 (2%)                             | 0 (0%)                               | 2 (3%)                    | 3 (5%)                     |
| <b>CES-D-10</b>                               |                                    |                                      |                           |                            |
| < 10                                          | 41 (68%)                           | 38 (58%)                             | 30 (50%)                  | 34 (72%)                   |
| ≥ 10                                          | 19 (32%)                           | 28 (42%)                             | 30 (50%)                  | 13 (28%)                   |
| <b>Primary sexual partner</b>                 |                                    |                                      |                           |                            |
| Has a primary sex partner                     | 52 (87%)                           | 61 (91%)                             | 54 (90%)                  | 52 (87%)                   |
| Age, mean (SD)                                | 21.3 (3.1)                         | 22.6 (4.1)                           | 23.6 (3.7)                | 24.5 (3.7)                 |
| In partnership >1 year                        | 25 (48%)                           | 44 (72%)                             | 32 (59%)                  | 32 (63%)                   |
| <b>HIV status</b>                             |                                    |                                      |                           |                            |
| HIV positive                                  | 1 (2%)                             | 1 (2%)                               | 0 (0%)                    | 1 (2%)                     |
| HIV negative                                  | 33 (63%)                           | 47 (77%)                             | 43 (80%)                  | 38 (73%)                   |
| Don't know                                    | 18 (35%)                           | 13 (21%)                             | 11 (20%)                  | 13 (25%)                   |
| <b>Has other partners</b>                     |                                    |                                      |                           |                            |
| Yes, I know or think so                       | 10 (19%)                           | 14 (23%)                             | 14 (26%)                  | 13 (25%)                   |
| No                                            | 16 (31%)                           | 24 (39%)                             | 6 (11%)                   | 6 (12%)                    |
| Don't know                                    | 26 (50%)                           | 23 (38%)                             | 34 (63%)                  | 33 (63%)                   |
| <b>Sexual Behavior, past 3 months</b>         |                                    |                                      |                           |                            |
| Vaginal sex                                   | 50 (83%)                           | 64 (96%)                             | 49 (82%)                  | 40 (69%)                   |
| Condom use with last sex act                  | 29 (60%)                           | 35 (59%)                             | 23 (48%)                  | 21 (55%)                   |
| Anal sex                                      | 7 (12%)                            | 4 (6%)                               | 6 (10%)                   | 3 (5%)                     |
| No sex partners, median (IQR)                 | 1.0 (1.0 – 2.0)                    | 1.0 (1.0 – 2.0)                      | 1.5 (1.0 – 3.0)           | 1.0 (1.0 – 2.0)            |
| Received goods or money for sex               | 7 (12%)                            | 10 (15%)                             | 33 (55%)                  | 16 (27%)                   |
| Intimate partner violence, past 6 months      | 3 (5%)                             | 3 (4%)                               | 11 (18%)                  | 19 (32%)                   |
| <b>Perceived HIV risk in next year</b>        |                                    |                                      |                           |                            |
| Very worried                                  | 22 (37%)                           | 19 (28%)                             | 6 (10%)                   | 24 (40%)                   |
| Somewhat worried                              | 7 (12%)                            | 8 (12%)                              | 0 (0%)                    | 14 (23%)                   |
| A little worried                              | 23 (38%)                           | 23 (34%)                             | 10 (17%)                  | 12 (20%)                   |
| Not at all worried                            | 8 (13%)                            | 17 (25%)                             | 44 (73%)                  | 10 (17%)                   |
| <b>Laboratory STI diagnosis at enrollment</b> |                                    |                                      |                           |                            |
| Gonorrhoea                                    | 11 (18%)                           | 5 (7%)                               | 3 (5%)                    | 2 (3%)                     |
| Chlamydia                                     | 26 (43%)                           | 19 (28%)                             | 16 (27%)                  | 10 (17%)                   |
| Trichomonas                                   | 5 (8%)                             | 1 (1%)                               | 1 (2%)                    | 6 (10%)                    |
| Syphilis seropositive                         | 2 (3%)                             | 0 (0%)                               | 1 (2%)                    | 3 (5%)                     |
| <b>Contraceptive use at enrollment</b>        |                                    |                                      |                           |                            |
| IUD                                           | 1 (2%)                             | 8 (12%)                              | 9 (15%)                   | 9 (15%)                    |

|            |          |          |          |          |
|------------|----------|----------|----------|----------|
| Implant    | 11 (18%) | 30 (45%) | 37 (62%) | 33 (55%) |
| Oral       | 0 (0%)   | 0 (0%)   | 0 (0%)   | 0 (0%)   |
| Injectable | 48 (80%) | 29 (43%) | 14 (23%) | 18 (30%) |

**Supplement Table 2: Adverse events during product use period and one month post product use periods**

| AEs                                        | Monthly dapivirine ring   |            |         |                                    |            |         | Oral PrEP                 |            |         |                                    |            |         |
|--------------------------------------------|---------------------------|------------|---------|------------------------------------|------------|---------|---------------------------|------------|---------|------------------------------------|------------|---------|
|                                            | During product use period |            |         | One month post product use period* |            |         | During product use period |            |         | One month post product use period* |            |         |
|                                            | 1st period                | 2nd period | Overall | 1st period                         | 2nd period | Overall | 1st period                | 2nd period | Overall | 1st period                         | 2nd period | Overall |
| <b>Total AEs</b>                           | 318                       | 305        | 623     | 179                                | 84         | 263     | 436                       | 391        | 827     | 118                                | 82         | 200     |
| Grade 2 and higher AEs                     | 202                       | 240        | 442     | 81                                 | 61         | 142     | 223                       | 233        | 456     | 98                                 | 66         | 164     |
| Product holds due to AEs                   | 0                         | 0          | 0       | 0                                  | 0          | 0       | 0                         | 0          | 0       | 0                                  | 0          | 0       |
| grade 2 AE                                 | 34                        | 41         | 75      | 34                                 | 13         | 47      | 27                        | 57         | 84      | 27                                 | 19         | 46      |
| grade 3AE                                  | 0                         | 0          | 0       | 0                                  | 0          | 0       | 0                         | 1          | 1       | 0                                  | 0          | 0       |
| grade 4 AE                                 | 0                         | 0          | 0       | 0                                  | 0          | 0       | 0                         | 0          | 0       | 0                                  | 0          | 0       |
| <b>Total SAEs</b>                          | 0                         | 0          | 0       | 0                                  | 0          | 0       | 2                         | 1          | 3       | 0                                  | 0          | 0       |
| SAEs resulting in hospitalization or death | 0                         | 0          | 0       | 0                                  | 0          | 0       | 2                         | 1          | 3       | 0                                  | 0          | 0       |

**Legend for Supplement, Table 2:**

\*Given the lack of a washout period between the randomized periods, the AEs reported in the first month post-product use for that period are separated out given the potential for misclassification or misattribution of AEs in the first month when participants switched from the ring to oral PrEP or oral PrEP to the ring.

**Supplement Table 3: Chronology of HIV seroconversions and drug levels prior to HIV seroconversion**

**Seroconverter 1: Seroconversion at month 6 of oral PrEP with moderate adherence**

| Visit/week on study | TFV (fmol/punch) | DPV (mg)<br>[release rate] | Adherence Category | HIV RNA                                   |
|---------------------|------------------|----------------------------|--------------------|-------------------------------------------|
| 2/Enroll            |                  |                            |                    | HIV RNA not detected                      |
| 4/Week 4            | 702              |                            | High               |                                           |
| 5/Week 8            | 597              |                            | Some               |                                           |
| 6/Week 12           | 677              |                            | Some               | HIV RNA not detected                      |
| 7/Week 16           | 608              |                            | Some               |                                           |
| 8/Week 20           | 378              |                            | Some               |                                           |
| 9/Week 24           | 145              |                            | Some               | HIV seroconversion<br>21,382 c/mL HIV RNA |
| 11/Week 28          |                  | 22.6<br>[4.1 mg/month]     | High               | 742,114 c/mL                              |

**Seroconverter 2: Seroconversion during choice period in which participant chose oral PrEP with low adherence**

| Visit/week on study | TFV-DP<br>(fmol/punch) | DPV (mg)<br>[release rate] | Adherence<br>Category | HIV                                |
|---------------------|------------------------|----------------------------|-----------------------|------------------------------------|
| 2/Enroll            |                        |                            |                       | HIV RNA not detected               |
| 4/Week 4            | 850                    |                            | High                  |                                    |
| 5/Week 8            | 358                    |                            | Some                  |                                    |
| 6/Week 12           | 253                    |                            | Some                  |                                    |
| 7/Week 16           | 271                    |                            | Some                  |                                    |
| 8/Week 20           | 543                    |                            | Some                  |                                    |
| 9/Week 24           | 288                    |                            | Some                  |                                    |
| 11/Week 28          |                        | 3.2                        | Some                  |                                    |
| 12/Week 32          |                        | 4.6                        | High                  |                                    |
| 13/Week 36          |                        | 4.7/0                      | High/None             | HIV RNA not detected               |
| 14/Week 40          |                        | 2.9                        | Some                  |                                    |
| 15/Week 44          |                        | 4.0                        | High                  |                                    |
| 16/Week 48          |                        | 5.4                        | High                  | HIV RNA not detected               |
| 18/Week 52          | 22.4                   |                            | Some                  |                                    |
| 19/Week 56          | 65.5                   |                            | Some                  | HIV seroconversion; 3,073,349 c/mL |

**Seroconverter 3: Seroconversion during first month of dapivirine ring use in choice period**

| Visit/week on study | TFV-DP (fmol/punch) | DPV (mg)<br>[release rate] | Adherence<br>Category | HIV                                |
|---------------------|---------------------|----------------------------|-----------------------|------------------------------------|
| 2/Enroll            |                     |                            |                       | HIV RNA not detected               |
| 4/Week 4            | 122                 |                            | Some                  |                                    |
| 5/Week 8            | 30.1                |                            | Some                  |                                    |
| 6/Week 12           | 161                 |                            | Some                  |                                    |
| 7/Week 16           | 96.6                |                            | Some                  |                                    |
| 8/Week 20           | 217                 |                            | Some                  |                                    |
| 9/Week 24           | 275                 |                            | Some                  | HIV RNA not detected               |
| 11/Week 28          |                     | 3.4                        | Some                  |                                    |
| 12/Week 32          |                     | 4.2                        | High                  |                                    |
| 13/Week 36          |                     | 6.3                        | High                  | HIV RNA not detected               |
| 14/Week 40          |                     |                            |                       |                                    |
| 15/Week 44          |                     |                            |                       |                                    |
| 16/Week 48          |                     |                            |                       |                                    |
| 18/Week 52          |                     |                            |                       |                                    |
| 19/Week 56          |                     |                            |                       |                                    |
| 20/Week 60          |                     |                            |                       |                                    |
| 21/Week 64          |                     |                            |                       |                                    |
| 22/Week 68          |                     | 3.2                        | Some                  | HIV seroconversion;<br>47,305 c/mL |

**Seroconverter 4: Seroconversion in month five of randomized dapivirine ring period with no use**

| Visit/week on study | TFV-DP (fmol/punch) | DPV mg<br>[release rate] | Adherence<br>Category | HIV                  |
|---------------------|---------------------|--------------------------|-----------------------|----------------------|
| 2/Enroll            |                     |                          |                       | HIV RNA not detected |
| 4/Week 4            | 1607                |                          | High                  |                      |
| 5/Week 8            | 1911                |                          | High                  |                      |
| 6/Week 12           | 1856                |                          | High                  |                      |
| 7/Week 16           | 1520                |                          | High                  |                      |
| 8/Week 20           | 1702                |                          | High                  |                      |
| 9/Week 24           | 1642                |                          | High                  |                      |



|            |  |       |           |                                     |
|------------|--|-------|-----------|-------------------------------------|
| 11/Week 28 |  | 1.9   | Some      |                                     |
| 12/Week 32 |  | 0.2   | None      |                                     |
| 13/Week 36 |  |       |           | HIV RNA not detected                |
| 14/Week 40 |  |       |           |                                     |
| 15/Week 44 |  | 0.5/0 | None/None |                                     |
| 16/Week 48 |  | 0.3   | None      | HIV seroconversion;<br>1433873 c/mL |

## **APPENDIX**

MTN034/ REACH Study Team Members

| <u>Last Name</u> | <u>First Name</u>  |
|------------------|--------------------|
| Bekker           | Linda-Gail         |
| Mahoney          | Scott              |
| Malan            | Gakiema            |
| Mpongo           | Cynthia Nombeko    |
| Ngqabe           | Nontshukumo        |
| Mshudulu         | Nobubele           |
| Pearce           | Nazmie             |
| Maphumulo        | Andile Angel       |
| Nyathi           | Angel Tinny        |
| Doreen           | Angeline           |
| Mzolo            | Nonhlanhla         |
| Jacques          | Ashleigh Catherine |
| Mashupane        | Baitseng Prudence  |
| Tshabalala       | Busisiwe           |
| Thatelo          | Constance Lebogang |
| Khakhane         | Dineo              |
| Mbewe            | Dorice             |
| Matta            | Eleanor Agnes      |
| Mlangeni         | Elizabeth Gugu     |
| Kekana           | Emily              |
| Docrat           | Fathima            |
| Mbatha           | Fezeka Brenda      |
| Buthelezi        | Fezile             |
| Mathebula        | Florence Tintswalo |
| Rampyapedi       | Hlalifi Sylvia     |

| <u>Last Name</u> | <u>First Name</u>      |
|------------------|------------------------|
| Mposula          | Hlengiwe Theodora      |
| Lukas            | Irene                  |
| Ntube            | Itai Tendai            |
| Moodley          | Kerushini              |
| Makgoka          | Kgabo Phineas          |
| Moodley          | Kimesha                |
| Reddy            | Krishnaveni            |
| Shale            | Lerato Raquelina       |
| Gama             | Lizzy                  |
| Govender         | Logashnee              |
| Mampuru          | Lydia Sesie            |
| Mthethwa         | Magdeline Judith       |
| Mkhabele         | Mahlori                |
| Maila            | Makgolane Nthabisheng  |
| Mokoena          | Maseponki Cecilia      |
| Mathipa          | Matheus Tiyo           |
| Shumi            | Menzele                |
| Gumede           | Sibusisiwe             |
| Mafata           | Mmathapelo Mmathoto    |
| Shogole          | Mogobalale Corlette    |
| Ramoshaba        | Moloke Philemon        |
| Maila            | Moshukutjoane Lebogang |
| Alphale          | Motsamai Anthony       |
| Moji             | Mpho Tshifiwe          |
| Dawood           | Nadia                  |

| <u>Last Name</u> | <u>First Name</u>    |
|------------------|----------------------|
| Cassim           | Nazneen              |
| Ndlovu           | Nkosiphile           |
| Sigcu            | Nompumelelo Samantha |
| Mayisela         | Nonkululeko Precious |
| Lutchman         | Odelia Beryl         |
| Maboa            | Onthatile Renolda    |
| Duma             | Promise              |
| Mahuba           | Rebone Frengelina    |
| Siwadawa         | Rotandwa Precious    |
| Naidoo           | Sandy                |
| Ismail           | Shameema             |
| Cozzi            | Shameen              |
| Mthimkulu        | Sicelo Samuel        |
| Yapi             | Simmikiwe            |
| Cibane           | Siyabonga Prince     |
| Tenza            | Siyanda Siphephelo   |
| Morudu           | Sophie Nomsa         |
| Sibeko           | Sylvia Sibongile     |
| Mutepe           | Talifhani Saddam     |
| Nhassengo        | Temantfulini Mamba   |
| Mathe            | Thembekile           |
| Palanee-Phillips | Thesla               |
| Sebego           | Thuso Constance      |
| Stuurman         | Tinyiko Reginah      |
| Cibi             | Vutombi              |

| <u>Last Name</u> | <u>First Name</u> |
|------------------|-------------------|
| Kunene           | Vuyelwa           |
| Naidoo           | Yuthika           |
| Aboobaker        | Zainub            |
| Akello           | Carolyne Agwau    |
| Nakalega         | Rita              |
| Gati Mirembe     | Brenda            |
| Nakabiito        | Clemensia         |
| Nansimbe         | Joselyne          |
| Kamira           | Betty             |
| Akasiima         | Afrika Simon      |
| Nabisere         | Joselyne          |
| Babirye          | Miscah Otim       |
| Kamya            | Justine           |
| Nabunya          | Hadijah Kalule    |
| Asiimwe          | Biira Florence    |
| Ouma             | Emmie Mulumba     |
| Zalwango         | Aisha             |
| Kyomukama        | Erinah            |
| Nalwoga          | Justine           |
| Mukalazi         | Rosemary Namwanje |
| Namuddu          | Agnes             |
| Kemigisha        | Doreen            |
| Etima            | Juliane           |
| Nakyanzi         | Teopista          |
| Cheptora         | Carolyne          |

| <u>Last Name</u> | <u>First Name</u> |
|------------------|-------------------|
| Kankindi         | Ann               |
| Nambusi          | Maria Janine      |
| Rukundo          | Ivan              |
| Ssemere          | Hassan            |
| Sakwa            | Rebecca           |
| Kakayi           | Brenda Catherine  |
| Ssenyonga        | Mark              |
| Valerie          | Christine Nagawa  |
| Kiiza            | Beatrice          |
| Birungi          | Eleanor           |
| Nakyeyune        | Justine           |
| Asello           | Juliet            |
| Nansamba         | Winnie            |
| Nalusiba         | Stella            |
| Balamusani       | David             |
| Chirenje         | Mike              |
| Mgodi            | Nyaradzo M        |
| Mugocha          | Caroline          |
| Nemasango        | Beauty            |
| Chitukuta        | Miria             |
| Mhlanga          | Nomsa             |
| Muvunzi          | Tariro            |
| Jones            | Judy              |
| Aridor           | Orly              |
| Duran            | Luis              |

| <u>Last Name</u> | <u>First Name</u> |
|------------------|-------------------|
| Riddler          | Sharon            |
| Dezutti          | Charlotte         |
| Mellors          | John              |
| Parkih           | Urvi              |
| Livant           | Edward            |
| Hall             | Wayne             |
| Beamer           | May               |
| Stoner           | Kevin             |
| Avolia           | Hilary            |
| Schille          | Jennifer          |
| Berthiaume       | Jennifer          |
| Richardson       | Barbra            |
| Balkus           | Jennifer          |
| Roberts          | Sarah             |
| Friedland        | Barbara           |
| Blanchette       | Cheryl            |
| Davis            | Jontraye          |
| Garcia           | Morgan            |
| Johnson          | Abraham           |
| Johnson          | Sherri            |
| Levy             | Lisa              |
| McClure          | Tara              |
| White            | Rhonda            |
